# Supplementary material
Source: Springer Nature journal article supplement (https://www.springermedizin.de/resource/supplementary/12889_2007_1031_MOESM7_ESM.pdf/9503174)

**% Contact-Level-Hours**

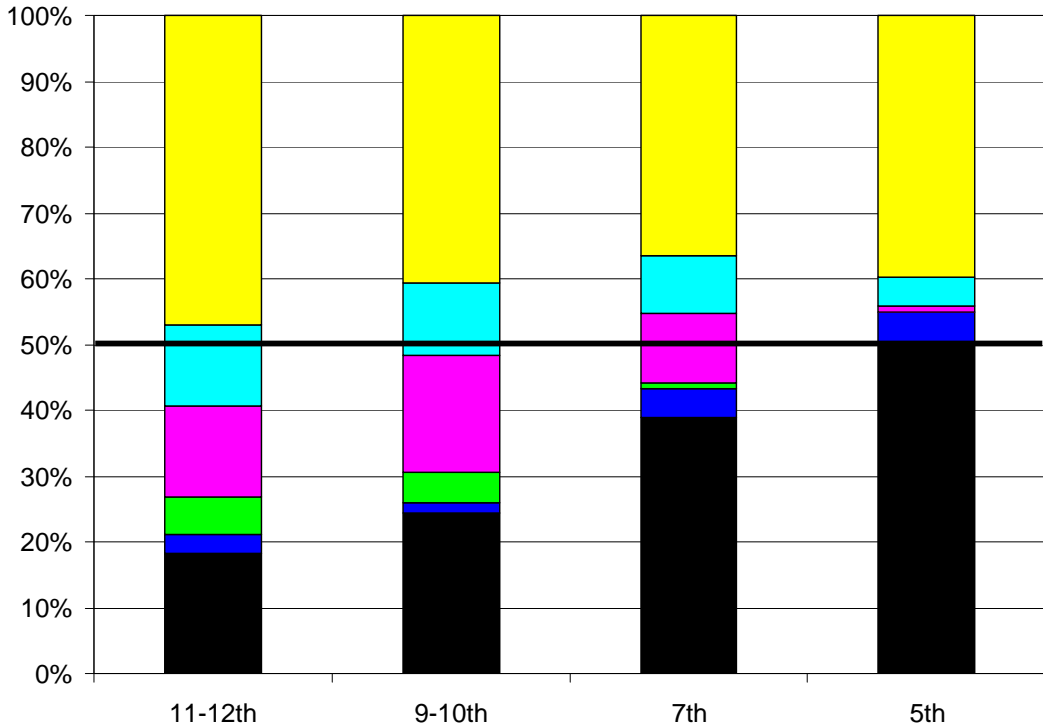

Supplement: MOESM7 [file 9503174]
